# Supplementary material for: A self-supported NiMoS4 nanoarray as an efficient 3D cathode for the alkaline hydrogen evolution reaction
Source: Royal Society of Chemistry journal article supplement (doi:10.1039/c7ta05521h), 2017-01-01
Supplement: c7ta05521h1.pdf [file c7ta05521h1.pdf]

## Electronic Supplementary Information

### Experimental section

**Materials:**  $\text{NH}_4\text{F}$ ,  $(\text{NH}_4)_2\text{MoS}_4$  and urea were purchased from Beijing Chemical Corp.  $\text{Ni}(\text{NO}_3)_2 \cdot 6\text{H}_2\text{O}$  were purchased from Aladdin Ltd (China). Ti mesh was purchased from Hangxu filter flagship store. Pt/C (20 wt% Pt on Vulcan XC-72R) and Nafion (5 wt%) were purchased from Sigma-Aldrich. All chemical reagents were used as received without further purification. The water used throughout all experiments was purified through a Millipore system.

**Preparation of  $\text{Ni}(\text{OH})_2/\text{Ti}$ :**  $\text{Ni}(\text{OH})_2/\text{Ti}$  was prepared as follows. Typically, a piece of Ti mesh ( $2 \times 3 \text{ cm}^2$ ) was washed with HCl, ethanol and deionized water several times to ensure the surface of the Ti mesh was well cleaned before use. The cleaned Ti mesh was immersed into a 40 mL aqueous solution containing 4 mmol  $\text{Ni}(\text{NO}_3)_2 \cdot 6\text{H}_2\text{O}$ , 20 mmol urea, and 8 mmol  $\text{NH}_4\text{F}$  at room temperature. The aqueous solution and Ti mesh were transferred to a 50 mL Teflon-lined stainless-steel autoclave and maintained at  $120^\circ\text{C}$  for 6 h, and then allowed to cool down naturally to room temperature. Then the Ti mesh with precursor was washed with deionized water several times and dried in oven.

**Preparation of  $\text{NiMoS}_4/\text{Ti}$ :**  $\text{NiMoS}_4/\text{Ti}$  was prepared by hydrothermal reaction. In a typical synthesis,  $(\text{NH}_4)_2\text{MoS}_4$  (0.06 g) was dissolved in 35 mL water under vigorous stirring for 30 min. Then the solution was transferred into a Teflon-lined stainless autoclave (50 mL) and the as-prepared  $\text{Ni}(\text{OH})_2/\text{Ti}$  was immersed into the solution. The autoclave was sealed and maintained at  $160^\circ\text{C}$  for 9 h in an electric oven. After cooled down slowly at room temperature, the  $\text{NiMoS}_4/\text{Ti}$  was taken out and washed with deionized water thoroughly before vacuum dried. Loading amount for  $\text{NiMoS}_4$  is about  $1.7 \text{ mg cm}^{-2}$ . Other control  $\text{NiMoS}_4/\text{Ti}$  samples with different loadings of 0.7, 3.6 and  $4.3 \text{ mg cm}^{-2}$  were prepared by using 0.1, 1.5 and 2 times reactants concentration.

**Preparation of Pt/C modified electrode Ti mesh:** 20 mg Pt/C and 10  $\mu\text{L}$  5 wt% Nafion solution were dispersed in 1 mL 1:1 v water/ethanol solvent by 30-min sonication to form an ink finally. Then 85  $\mu\text{L}$  catalyst ink was loaded on bare Ti mesh

with a catalyst loading of 1.7 mg cm<sup>-2</sup>.

**Characterizations:** XRD data were collected on a RigakuD/MAX 2550 diffractometer with Cu K $\alpha$  radiation ( $\lambda$  = 1.5418 Å). SEM measurements were performed on a XL30 ESEM FEG scanning electron microscope at an accelerating voltage of 20 kV. TEM images were collected on a HITACHI H-8100 electron microscopy (Hitachi, Tokyo, Japan) operated at 200 kV. XPS data were acquired on an ESCALABMK II X-ray photoelectron spectrometer using Mg as the exciting source.

**Electrochemical measurements:** Electrochemical measurements were performed with a CHI 660E electrochemical analyzer (CH Instruments, Inc., Shanghai) in a standard three-electrode system. NiMoS<sub>4</sub>/Ti was used as the working electrode. A graphite rod and an SCE electrode were used as the counter electrode and the reference electrode, respectively. The temperature of solution was kept at 25 °C for all the measurements via the adjustment of air condition and heating support, which ensured the variation of diffusion coefficient below 1%. The potentials reported in this work were calibrated to RHE other than especially explained, using the following equation:  $E_0 \text{ (RHE)} = E \text{ (SCE)} + (0.242 + 0.059 \text{ pH}) \text{ V}$ . The iR-correction of LSV curves was done using the following equation:  $E \text{ (RHE)} = E_0 \text{ (RHE)} - I * R_s$ , I is current (A) and  $R_s$  is solution resistance.

**Active sites calculation:** The NiMoS<sub>4</sub>/Ti electrode was prepared as mentioned above. CV measurements were carried out in PBS electrolyte (pH: 7). Then, the absolute components of the voltammetric charges (cathodic and anodic) reported during the measurement were added. Assuming one electron redox process, this absolute charge was divided by two. The value was then divided by the Faraday constant to get the number of active sites (n) of the NiMoS<sub>4</sub>/Ti electrode.

**TOF calculation:** The turnover frequency (s<sup>-1</sup>) was calculated following equation:

$$\text{TOF} = I/2nF$$

I: Current (A) during the LSV measurement in 0.1 M KOH.

F: Faraday constant (C/mol).

n: Number of active sites (mol).

The factor 1/2 arrives by taking into account that two electrons are required to form one

hydrogen molecule from two protons.

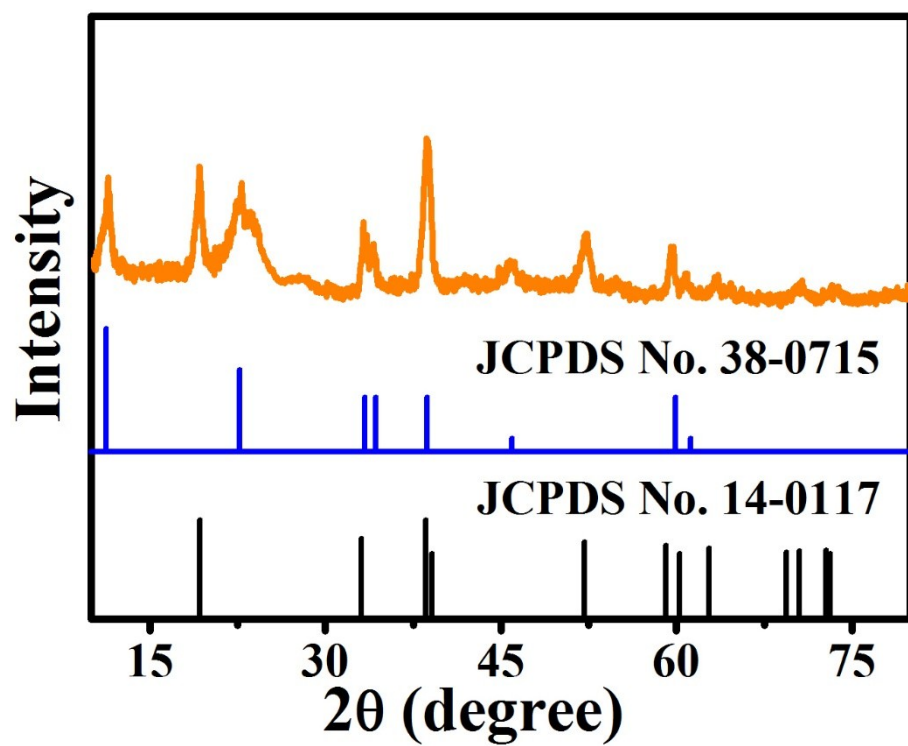

**Fig. S1.** XRD patterns for Ni(OH)<sub>2</sub> nanosheet scraped from Ti mesh.

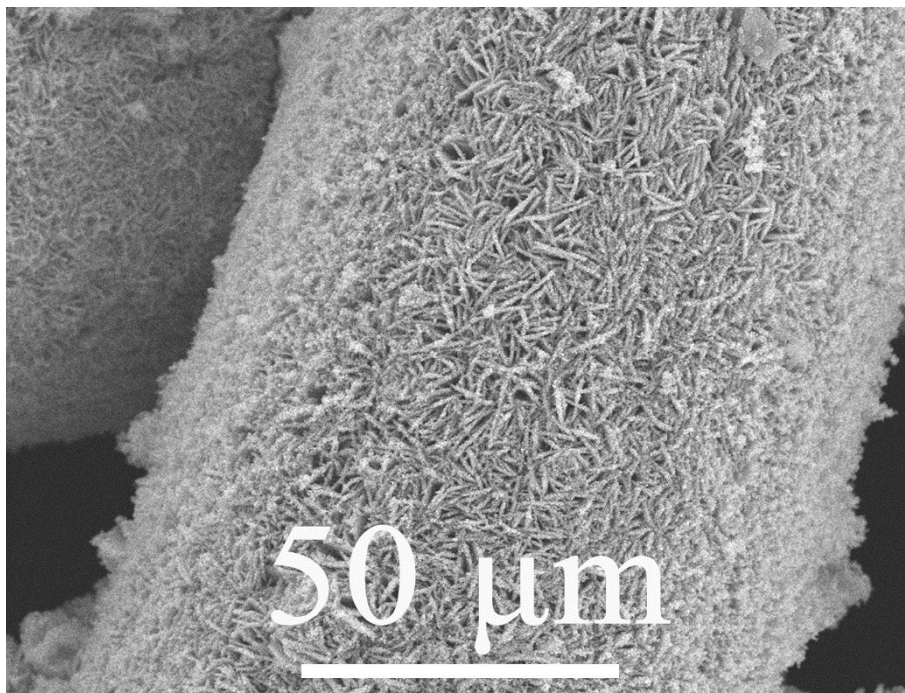

**Fig. S2.** SEM image of NiMoS<sub>4</sub>/Ti.

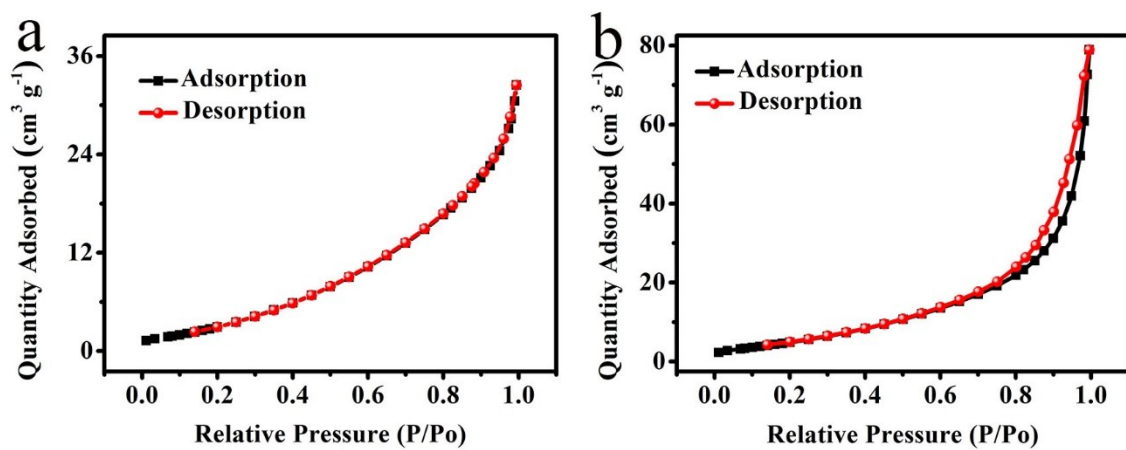

**Fig. S3.** Nitrogen adsorption/desorption curves of (a)  $\text{Ni(OH)}_2$  and (b)  $\text{NiMoS}_4$ .

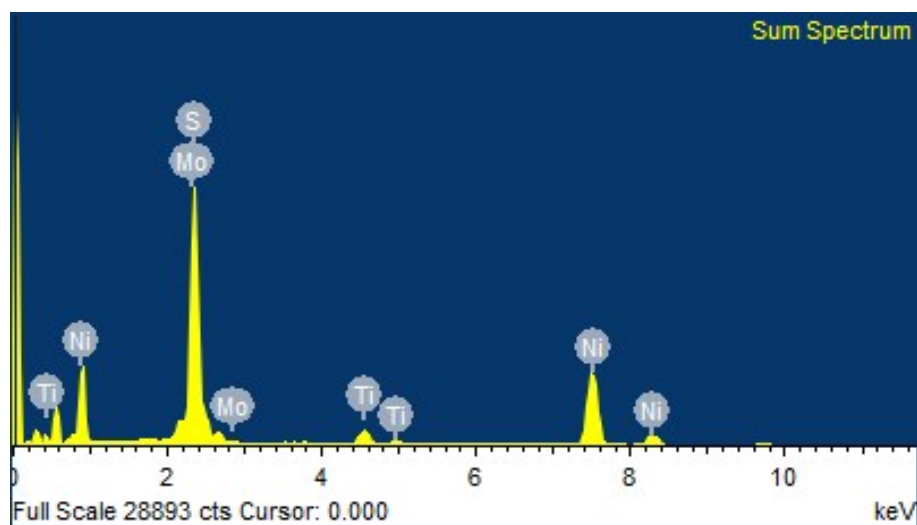

**Fig. S4.** EDX spectrum for NiMoS<sub>4</sub>/Ti.

**Table S1.** EDX data of NiMoS<sub>4</sub>/Ti

| Element | Weight% | Atomic% |
|---------|---------|---------|
| S K     | 43.57   | 64.15   |
| Ti K    | 3.85    | 3.83    |
| Ni K    | 19.91   | 15.98   |
| Mo L    | 32.67   | 16.04   |



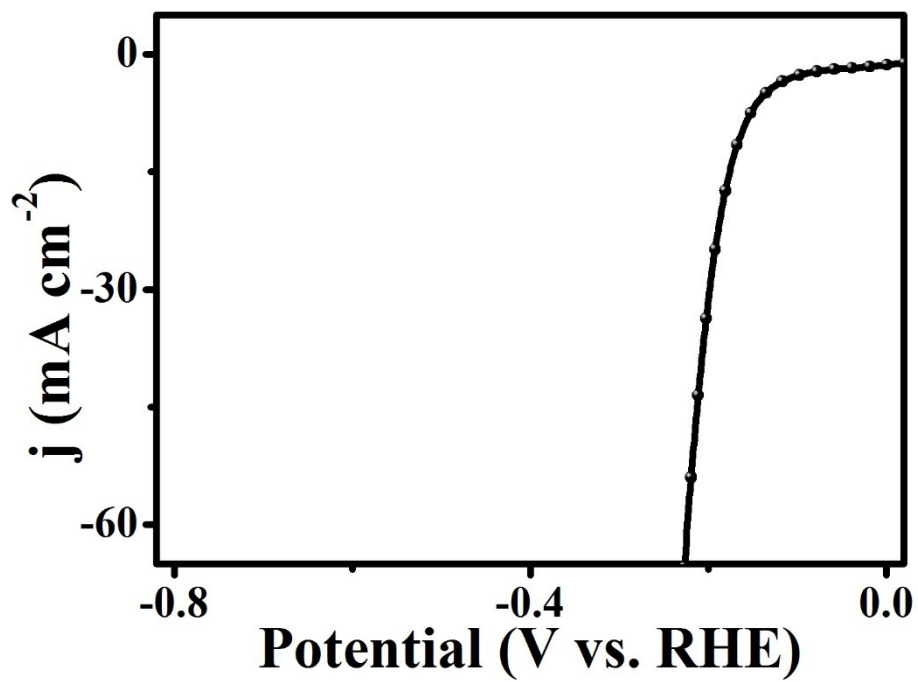

**Fig. S5.** LSV curve for NiMoS<sub>4</sub>/Ti with a scan rate of 2 mV s<sup>-1</sup> for HER in 1.0 M KOH.

**Table S2.** Comparison of HER performance for NiMoS<sub>4</sub>/Ti with other non-noble-metal electrocatalysts in alkaline media.

| Catalyst                             | j (mA cm <sup>-2</sup> ) | $\eta$ (mV) | Electrolyte | Ref.      |
|--------------------------------------|--------------------------|-------------|-------------|-----------|
| NiMoS <sub>4</sub> /Ti               | 10                       | 194         | 0.1 M KOH   | This work |
|                                      | 50                       | 263         |             |           |
|                                      | 10                       | 138         | 1.0 M KOH   |           |
|                                      | 50                       | 185         |             |           |
| NiMo <sub>3</sub> S <sub>4</sub> /GC | 10                       | 257         | 0.1 M KOH   | 1         |
| Ni(OH) <sub>2</sub> /NF              | 10                       | 250         | 1.0 M NaOH  | 2         |
| NiFe LDH/NF                          | 10                       | 210         | 1.0 M NaOH  | 2         |
| Ni(OH) <sub>2</sub> /Ti              | 30                       | ~290        | 0.1 M KOH   | 3         |
| NiP <sub>2</sub> /CC                 | 50                       | 190         | 1.0 M KOH   | 4         |
| Ni <sub>2</sub> P/GCE                | 20                       | 250         | 1.0 M KOH   | 5         |
| NiS <sub>2</sub> /GS                 | 10                       | 190         | 1.0 M NaOH  | 6         |
| NiSe/NF                              | 50                       | 190         | 1.0 M KOH   | 7         |
| NiMoS <sub>4</sub> /GCE              | 10                       | 191         | 1.0 M KOH   | 8         |
| Mo <sub>2</sub> C                    | 10                       | 270         | 1.0 M KOH   | 9         |
| MoB                                  | 10                       | ~220        | 1.0 M KOH   | 10        |
| CoO <sub>x</sub> @CN                 | 10                       | 232         | 1.0 M KOH   | 11        |
| Co-NRCNTs                            | 10                       | 370         | 1.0 M KOH   | 12        |
| Co-P/Co-PO <sub>4</sub>              | 10                       | ~380        | 1.0 M KOH   | 13        |
| CeO <sub>2</sub> /CoSe <sub>2</sub>  | 10                       | 288         | 0.1 M KOH   | 14        |
| Au@Co <sub>3</sub> O <sub>4</sub> /C | 25                       | 420         | 0.1 M KOH   | 15        |
| Co <sub>3</sub> O <sub>4</sub> C-NA  | 50                       | 390         | 0.1 M KOH   | 16        |
| CCHH/MWCNT                           | 50                       | 353         | 0.1 M KOH   | 17        |

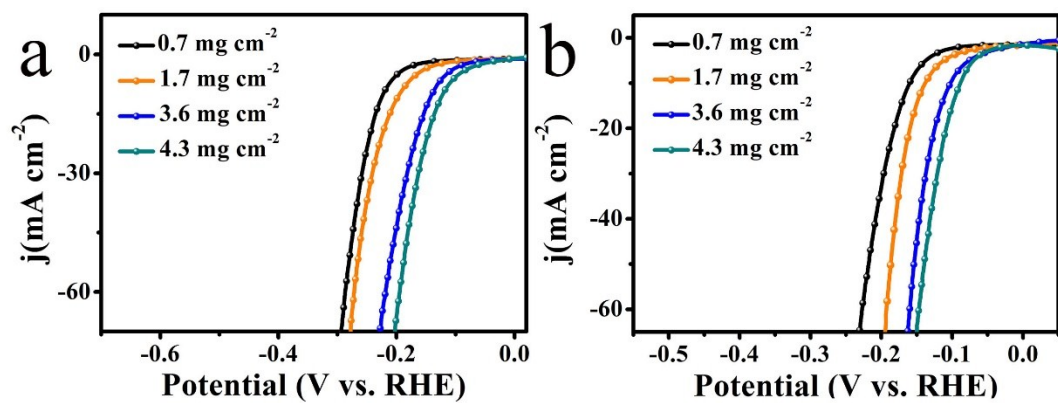

**Fig. S6.** LSV curves for NiMoS<sub>4</sub>/Ti with different loadings at a scan rate of 2 mV s<sup>-1</sup> for HER in (a) 0.1 M KOH and (b) 1.0 M KOH.

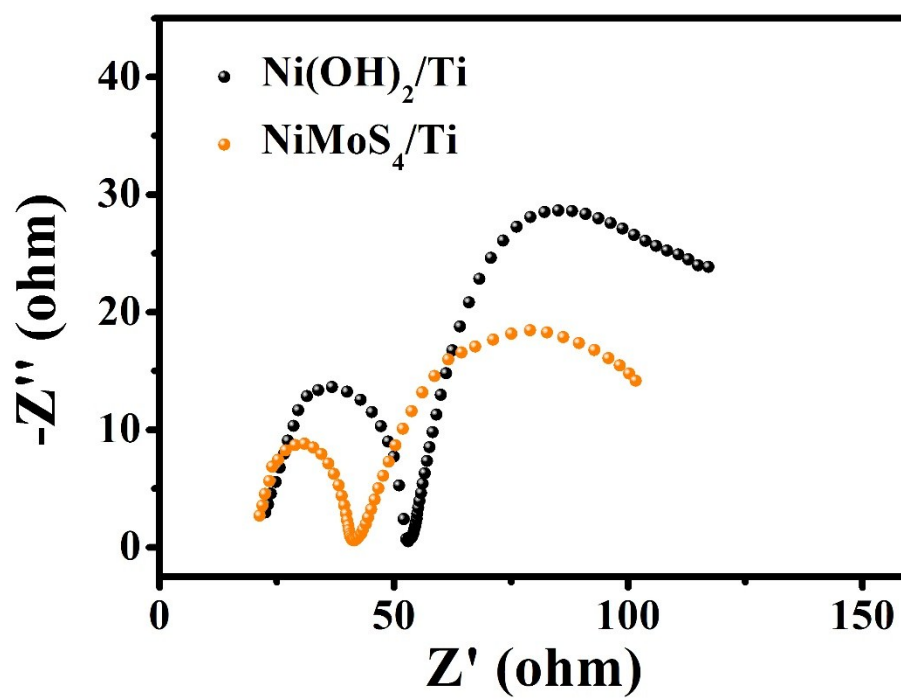

**Fig. S7.** (a) Nyquist plots of  $\text{Ni(OH)}_2/\text{Ti}$  and  $\text{NiMoS}_4/\text{Ti}$  recorded in 0.1 M KOH.

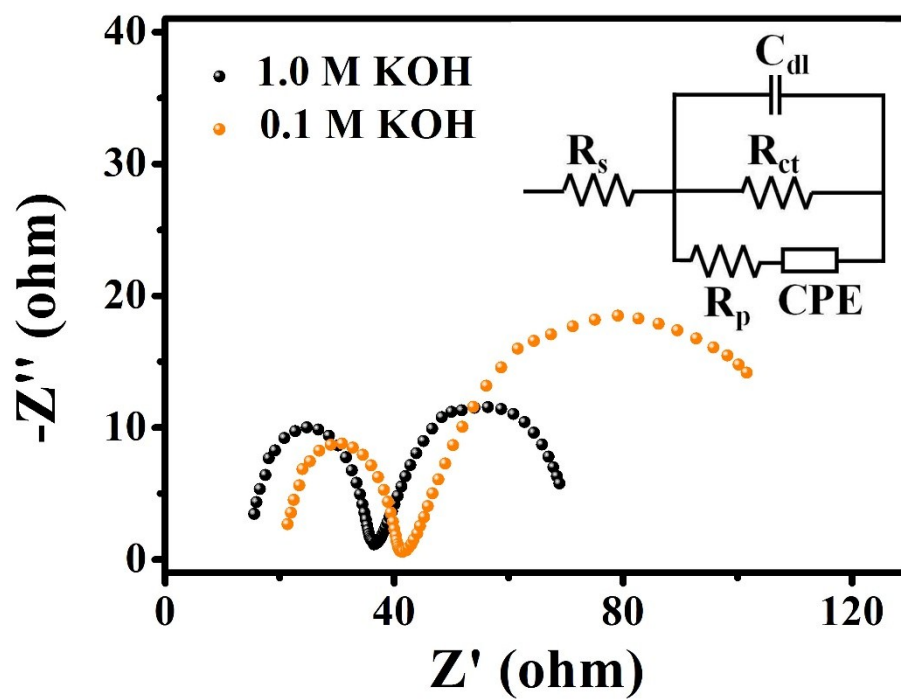

**Fig. S8.** Nyquist plots of NiMoS<sub>4</sub>/Ti recorded in 1.0 and 0.1 M KOH. (inset: circuit diagram, where  $R_s$  is the solution resistance,  $R_{ct}$  is the charge transfer resistance,  $R_p$  is related to the porosity of the electrode surface).

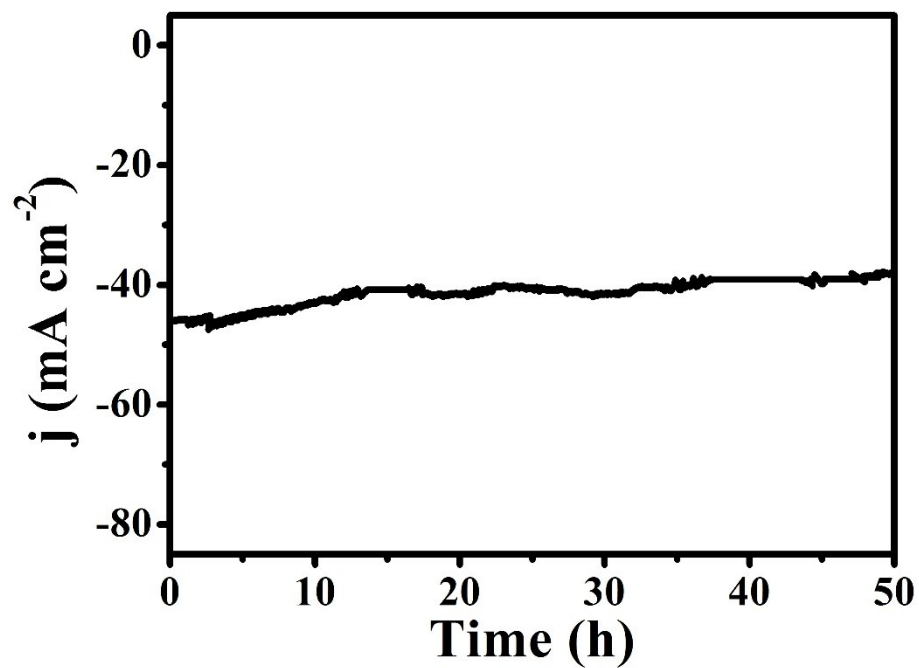

**Fig. S9.** Time-dependent current density curve at a fixed overpotential of 220 mV for  $\text{NiMoS}_4/\text{Ti}$  in 1.0 M KOH.

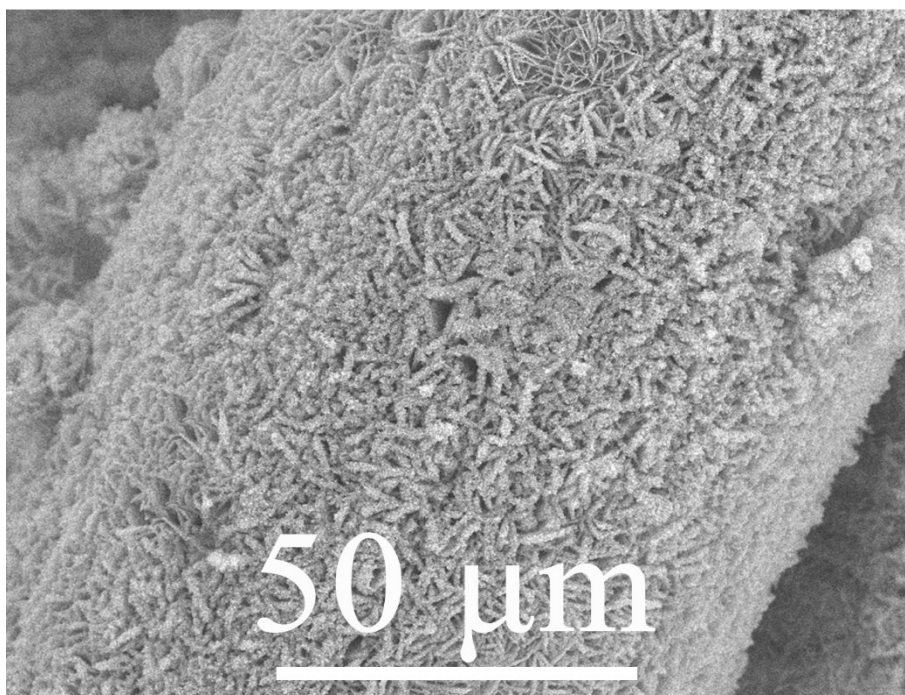

**Fig. S10.** SEM image of NiMoS<sub>4</sub>/Ti after long-term stability test.

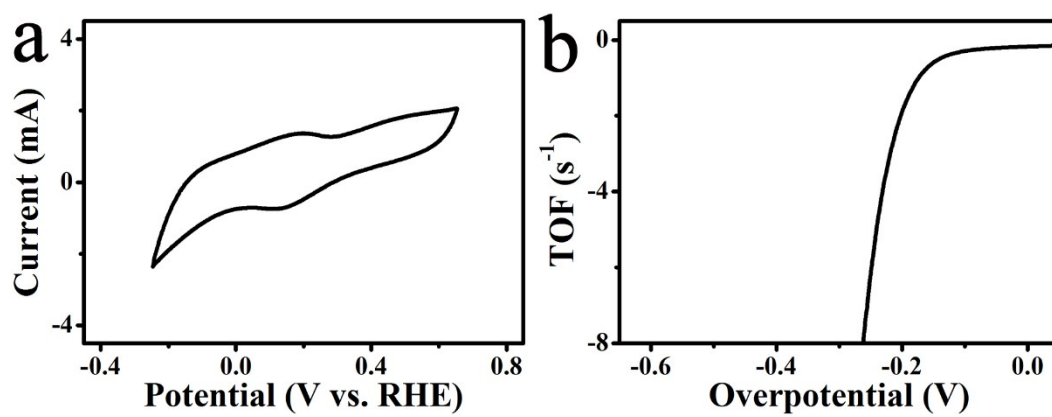

**Fig. S11.** (a) Cyclic voltammogram of NiMoS<sub>4</sub>/Ti in PBS with a scan rate of 50 mV s<sup>-1</sup>. (b) Calculated TOFs for NiMoS<sub>4</sub>/Ti in 0.1 M KOH.



## References

- 1 J. Jiang, M. Gao, W. Sheng and Y. Yan, *Angew. Chem., Int. Ed.*, 2016, **55**, 15240–15245.
- 2 J. Luo, J. Im, M. T. Mayer, M. Schreier, M. K. Nazeeruddin, N. G. Park, S. D. Tilley, H. Fan and M. Grätzel, *Science*, 2014, **345**, 1593–1596.
- 3 N. Danilovic, R. Subbaraman, D. Strmcnik, K.-C. Chang, A. P. Paulikas, V. R. Stamenkovic and N. M. Markovic, *Angew. Chem., Int. Ed.*, 2012, **51**, 12495–12498.
- 4 P. Jiang, Q. Liu and X. Sun, *Nanoscale*, 2014, **6**, 13440–13445.
- 5 L. Feng, H. Vrubel, M. Bensimon and X. Hu, *Phys. Chem. Chem. Phys.*, 2014, **16**, 5917–5921.
- 6 X. Wu, B. Yang, Z. Li, L. Lei and X. Zhang, *RSC Adv.*, 2015, **5**, 32976–32982.
- 7 C. Tang, N. Cheng, Z. Pu, W. Xing and X. Sun, *Angew. Chem., Int. Ed.*, 2015, **54**, 9351–9355.
- 8 L. Shao, X. Qian, X. Wang, H. Li, R. Yan and L. Hou, *Electrochim. Acta*, 2016, **213**, 236–243.
- 9 C. G. Morales-Guio, K. Thorwarth, B. Niesen, L. Liardet, J. Patscheider, C. Ballif and X. Hu, *J. Am. Chem. Soc.*, 2015, **137**, 7035–7038.
- 10 H. Vrubel and X. Hu, *Angew. Chem., Int. Ed.*, 2012, **51**, 12703–12706.
- 11 H. Jin, J. Wang, D. Su, Z. Wei, Z. Pang and Y. Wang, *J. Am. Chem. Soc.*, 2015, **137**, 2688–2694.
- 12 X. Zou, X. Huang, A. Goswami, R. Silva, B. R. Sathe, E. Mikmeková and T. Asefa, *Angew. Chem., Int. Ed.*, 2014, **53**, 4372–4376.
- 13 Y. Yang, H. Fei, G. Ruan and J. M. Tour, *Adv. Mater.*, 2015, **27**, 3175–3180.
- 14 Y. Zheng, M. Gao, Q. Gao, H. Li, J. Xu, Z. Wu and S. Yu, *Small*, 2015, **11**, 182–188.
- 15 Z. Zhuang, W. Sheng and Y. Yan, *Adv. Mater.*, 2014, **26**, 3950–3955.
- 16 T. Ma, S. Dai, M. Jaroniec and S. Qiao, *J. Am. Chem. Soc.*, 2014, **136**, 13925–13931.

- 17 Y. Zhang, Q. Xiao, X. Guo, X. Zhang, Y. Xue, L. Jing, X. Zhai, Y. Yan and K. Sun, *J. Power Sources*, 2015, **278**, 464–472.
